# Supplementary material
Source: PubMed Central journal article supplement (PMC7964612)
Supplement: 3113_table.pdf [file 3113_table.pdf]

**On-line Table: Individual information for the ADNI participants used in this study**

| CN participants |     |        | AD participants |     |        |
|-----------------|-----|--------|-----------------|-----|--------|
| ADNI ID         | Age | Gender | ADNI ID         | Age | Gender |
| 3               | 81  | M      | 2               | 74  | M      |
| 10              | 74  | F      | 5               | 74  | M      |
| 53              | 80  | M      | 8               | 84  | F      |
| 147             | 60  | F      | 14              | 78  | F      |
| 149             | 88  | M      | 16              | 65  | M      |
| 167             | 77  | M      | 21              | 72  | F      |
| 183             | 73  | F      | 23              | 71  | M      |
| 213             | 63  | M      | 43              | 76  | M      |
| 216             | 85  | M      | 47              | 84  | M      |
| 219             | 75  | M      | 48              | 78  | M      |
| 228             | 81  | F      | 55              | 75  | M      |
| 266             | 86  | M      | 67              | 74  | M      |
| 286             | 66  | M      | 74              | 78  | M      |
| 316             | 81  | M      | 90              | 69  | M      |
| 321             | 69  | M      | 95              | 71  | M      |
| 341             | 74  | M      | 96              | 79  | M      |
| 343             | 72  | M      | 97              | 72  | F      |
| 370             | 75  | F      | 120             | 72  | M      |
| 374             | 76  | F      | 123             | 74  | M      |
| 400             | 69  | M      | 130             | 74  | M      |
| 431             | 84  | M      | 171             | 79  | F      |
| 438             | 82  | M      | 173             | 74  | M      |
| 470             | 87  | F      | 223             | 78  | F      |
| 474             | 78  | F      | 230             | 80  | M      |
| 492             | 88  | M      | 232             | 78  | M      |
| 497             | 76  | M      | 245             | 74  | F      |
| 535             | 77  | M      | 259             | 71  | M      |
| 543             | 72  | F      | 262             | 86  | M      |
| 547             | 76  | M      | 272             | 71  | F      |
| 554             | 72  | M      | 283             | 79  | M      |
| 565             | 75  | M      | 301             | 74  | F      |
| 577             | 73  | F      | 311             | 78  | F      |
| 627             | 59  | F      | 312             | 83  | M      |
| 642             | 85  | M      | 315             | 72  | M      |
| 653             | 73  | F      | 319             | 71  | F      |
| 682             | 68  | M      | 327             | 70  | M      |
| 690             | 80  | M      | 352             | 77  | F      |
| 699             | 82  | M      | 359             | 82  | F      |
| 712             | 77  | M      | 360             | 73  | M      |
| 720             | 77  | F      | 363             | 72  | F      |
| 730             | 71  | F      | 386             | 73  | F      |
| 740             | 72  | M      | 416             | 73  | F      |
| 743             | 86  | M      | 419             | 70  | M      |
| 747             | 72  | M      | 420             | 74  | M      |
| 754             | 67  | F      | 454             | 82  | F      |
| 760             | 69  | F      | 459             | 73  | M      |
| 777             | 75  | F      | 467             | 81  | F      |
| 786             | 74  | M      | 484             | 71  | M      |
| 836             | 83  | M      | 489             | 74  | F      |
| 841             | 77  | F      | 498             | 71  | M      |
| 850             | 78  | M      | 500             | 78  | M      |
| 889             | 72  | F      | 502             | 75  | M      |
| 891             | 79  | F      | 506             | 72  | F      |
| 929             | 82  | M      | 522             | 70  | M      |
| 979             | 86  | M      | 526             | 85  | F      |
| 991             | 86  | F      | 533             | 81  | F      |
| 1001            | 69  | M      | 534             | 63  | M      |
| 1037            | 73  | M      | 555             | 77  | M      |
| 1041            | 71  | M      | 575             | 86  | F      |
| 1044            | 65  | M      | 576             | 78  | M      |
| 1056            | 71  | F      | 610             | 79  | M      |
| 1062            | 82  | M      | 618             | 75  | M      |

(Continued)

**On-line Table: Continued**

| CN participants |     |        | AD participants |     |        |
|-----------------|-----|--------|-----------------|-----|--------|
| ADNI ID         | Age | Gender | ADNI ID         | Age | Gender |
| 1090            | 71  | M      | 637             | 76  | F      |
| 1109            | 77  | F      | 647             | 73  | M      |
| 1144            | 77  | M      | 648             | 71  | F      |
| 1157            | 84  | F      | 657             | 78  | F      |
| 1161            | 79  | M      | 672             | 62  | F      |
| 1164            | 69  | F      | 680             | 78  | M      |
| 1171            | 71  | M      | 686             | 72  | M      |
| 1201            | 75  | F      | 731             | 71  | M      |
| 1205            | 83  | M      | 734             | 73  | M      |
| 1221            | 72  | M      | 741             | 80  | F      |
| 1254            | 85  | M      | 751             | 71  | M      |
| 1263            | 65  | F      | 768             | 77  | M      |
| 1281            | 78  | F      | 778             | 72  | M      |
| 1283            | 60  | M      | 779             | 79  | M      |
| 1285            | 80  | F      | 813             | 73  | M      |
| 1290            | 80  | F      | 818             | 74  | F      |
| 1307            | 76  | F      | 842             | 73  | M      |
| 1339            | 80  | F      | 843             | 70  | M      |
| 1341            | 72  | F      | 845             | 80  | M      |
| 1354            | 59  | F      | 862             | 73  | F      |
| 1368            | 76  | F      | 863             | 79  | M      |
| 1371            | 85  | M      | 866             | 80  | F      |
| 1373            | 76  | M      | 883             | 76  | F      |
| 1379            | 88  | M      | 898             | 83  | F      |
| 1382            | 65  | M      | 934             | 70  | F      |
| 1391            | 85  | M      | 967             | 77  | M      |
| 1397            | 55  | F      | 972             | 77  | M      |
| 1402            | 70  | M      | 985             | 81  | M      |
| 1409            | 66  | M      | 1002            | 76  | F      |
| 1430            | 83  | F      | 1013            | 78  | M      |
|                 |     |        | 1023            | 77  | F      |
|                 |     |        | 1063            | 78  | F      |
|                 |     |        | 1099            | 79  | F      |
|                 |     |        | 1133            | 79  | F      |
|                 |     |        | 1194            | 85  | M      |
|                 |     |        | 1195            | 77  | M      |
|                 |     |        | 1197            | 83  | F      |
|                 |     |        | 1200            | 84  | M      |
|                 |     |        | 1202            | 78  | M      |
|                 |     |        | 1203            | 84  | M      |
